# Supplementary material
Source: publisher figshare collection journal article supplement (https://tandf.figshare.com/articles/dataset/_/3563526)
Supplement: Supplementary file 1 [file 1]

**Table S1.** Growth media used in this study

|                                                     |                        |
|-----------------------------------------------------|------------------------|
| TY medium                                           |                        |
| tryptone                                            | 5 g L <sup>-1</sup>    |
| yeast extract                                       | 3 g L <sup>-1</sup>    |
| CaCl <sub>2</sub> •6H <sub>2</sub> O                | 1.3 g L <sup>-1</sup>  |
| L3+N or L3–N media                                  |                        |
| DL-sodium lactate                                   | 10 g L <sup>-1</sup>   |
| potassium phosphate                                 | 10 mM                  |
| NH <sub>4</sub> Cl                                  | 10 mM or 0 mM          |
| MgSO <sub>4</sub> •7H <sub>2</sub> O                | 100 mg L <sup>-1</sup> |
| NaCl                                                | 50 mg L <sup>-1</sup>  |
| CaCl <sub>2</sub> •2H <sub>2</sub> O                | 40 mg L <sup>-1</sup>  |
| FeCl <sub>3</sub> •6H <sub>2</sub> O                | 5.4 mg L <sup>-1</sup> |
| Na <sub>2</sub> MoO <sub>4</sub> •2H <sub>2</sub> O | 5 mg L <sup>-1</sup>   |
| biotin                                              | 2 mg L <sup>-1</sup>   |
| nicotinic acid                                      | 4 mg L <sup>-1</sup>   |
| pantothenic acid                                    | 4 mg L <sup>-1</sup>   |
