# Supplementary material
Source: publisher figshare collection journal article supplement (https://tandf.figshare.com/articles/dataset/_/3563526)
Supplement: Supplementary file 2 [file 1]

**Table S2.** PCR primers used in this study

| Primer                     | Sequence (5'-3')                               |
|----------------------------|------------------------------------------------|
| <i>ggm</i> deletion        |                                                |
| P1 <sup>a</sup>            | <u>CGAATTC</u> ACGCCCTATTACTGGAGCTG            |
| P2 <sup>b</sup>            | <u>CGATGTAATCCAGCTCCTGCGTCAGGAAGAAGGCGGAGA</u> |
| P3                         | GCAGGAGCTGGATTACATCG                           |
| P4 <sup>c</sup>            | GCT <u>CTAGACTCTTTCCATCTGGCTCTCG</u>           |
| <i>ggm</i> complementation |                                                |
| P5 <sup>a</sup>            | <u>CGAATTC</u> GGCATGGGGGAGGACTAT              |
| P6 <sup>c</sup>            | GCT <u>CTAGAGTCAGAAGTTCCGCAGCAG</u>            |
| Expression of AZC_3319     |                                                |
| E1                         | TGGAGTTTGCCGAGACCTAC                           |
| E2                         | CGAGGAAGGTCTTCTGTTCG                           |
| Expression of AZC_3325     |                                                |
| E3                         | CTGCATTTCTCCCAATCGTT                           |
| E4                         | GACAGCAGAACGAGGGTCTC                           |
| Expression of AZC_3326     |                                                |
| E5                         | GGTCCACGACGTGATCTTC                            |
| E6                         | CGTCTCCTGAGTTTCCGAAC                           |
| Expression of AZC_3328     |                                                |
| E7                         | CGGTCATCAAGAACATCAGC                           |
| E8                         | TGGCCGTCCAGATAGATACC                           |
| Expression of AZC_3329     |                                                |
| E9                         | GTCATGCTGCTGTTCAACCAT                          |
| E10                        | ACGATGTAATTGGCCTCCAG                           |
| Expression of AZC_3331     |                                                |
| E11                        | CTCCATCGACATCAAGCAGA                           |
| E12                        | TCAAGGAAAGCCTTCAGCTC                           |
| Expression of 16S rRNA     |                                                |
| S1                         | ACGGATTTCTTCCAGCAATG                           |
| S2                         | ACCGGCAGTCCCTTTAGAGT                           |

<sup>a</sup> The *EcoR* I site is underlined.<sup>b</sup> The sequence complementary to P3 is underlined.<sup>c</sup> The *Xba* I site is underlined.
